# Supplementary material for: An organic–inorganic hybrid nanomaterial composed of a Dowson-type (NH4)6P2Mo18O62heteropolyanion and a metal–organic framework: synthesis, characterization, and application as an effective adsorbent for the removal of organic dyes
Source: Royal Society of Chemistry journal article supplement (doi:10.1039/d0ra07042d), 2020-01-01
Supplement: d0ra07042d1.pdf [file d0ra07042d1.pdf]

## SUPPORTING INFORMATION (SI)

### **Organic–inorganic hybrid nanomaterials composed of Dowson-type $(\text{NH}_4)_6\text{P}_2\text{Mo}_{18}\text{O}_{62}$ heteropolyanion and metal–organic framework: synthesis, characterization, and application as an effective adsorbent for the removal of organic dyes**

Akram-Alsadat Hoseini, Saeed Farhadi,\* Abedin Zabardasti, Firouzeh Siadatnasab

Department of Chemistry, Lorestan University, Khorramabad, Iran

\*Corresponding author: E-mail: [sfarhad2001@yahoo.com](mailto:sfarhad2001@yahoo.com)

Tel.: +986633120611; Fax: +986633120618

**Fig. S1** Zeta potential curves of (a) pure MIL-101 and (b)  $\text{P}_2\text{Mo}_{18}/\text{MIL}-101$  (Cr) in aqueous solutions.

**Fig. S2** (a) FT-IR spectrum of (a) pure MB dye, (b)  $\text{P}_2\text{Mo}_{18}/\text{MIL}-101$  (Cr) and (c)  $\text{P}_2\text{Mo}_{18}/\text{MIL}-101$  (Cr) after adsorbing MB dye solutions.

**Fig. S3** EDX spectrum of the  $\text{P}_2\text{Mo}_{18}/\text{MIL}-101$  (Cr) after adsorbing MB dye.

**Fig. S4** EDX elemental mappings of the  $\text{P}_2\text{Mo}_{18}/\text{MIL}-101$  (Cr) after adsorbing MB dye.

**Fig. S5** FE-SEM images at different magnifications of the  $\text{P}_2\text{Mo}_{18}/\text{MIL}-101$  (Cr) after adsorbing MB dye.

**Fig. S6** XRD pattern of the  $\text{P}_2\text{Mo}_{18}/\text{MIL}-101$  (Cr) after adsorbing MB dye.

**Fig. S7** (a)  $\text{N}_2$  adsorption-desorption isotherms and (b) BJH pore-size distribution plots of the  $\text{P}_2\text{Mo}_{18}/\text{MIL}-101$  (Cr) after adsorbing MB dye.

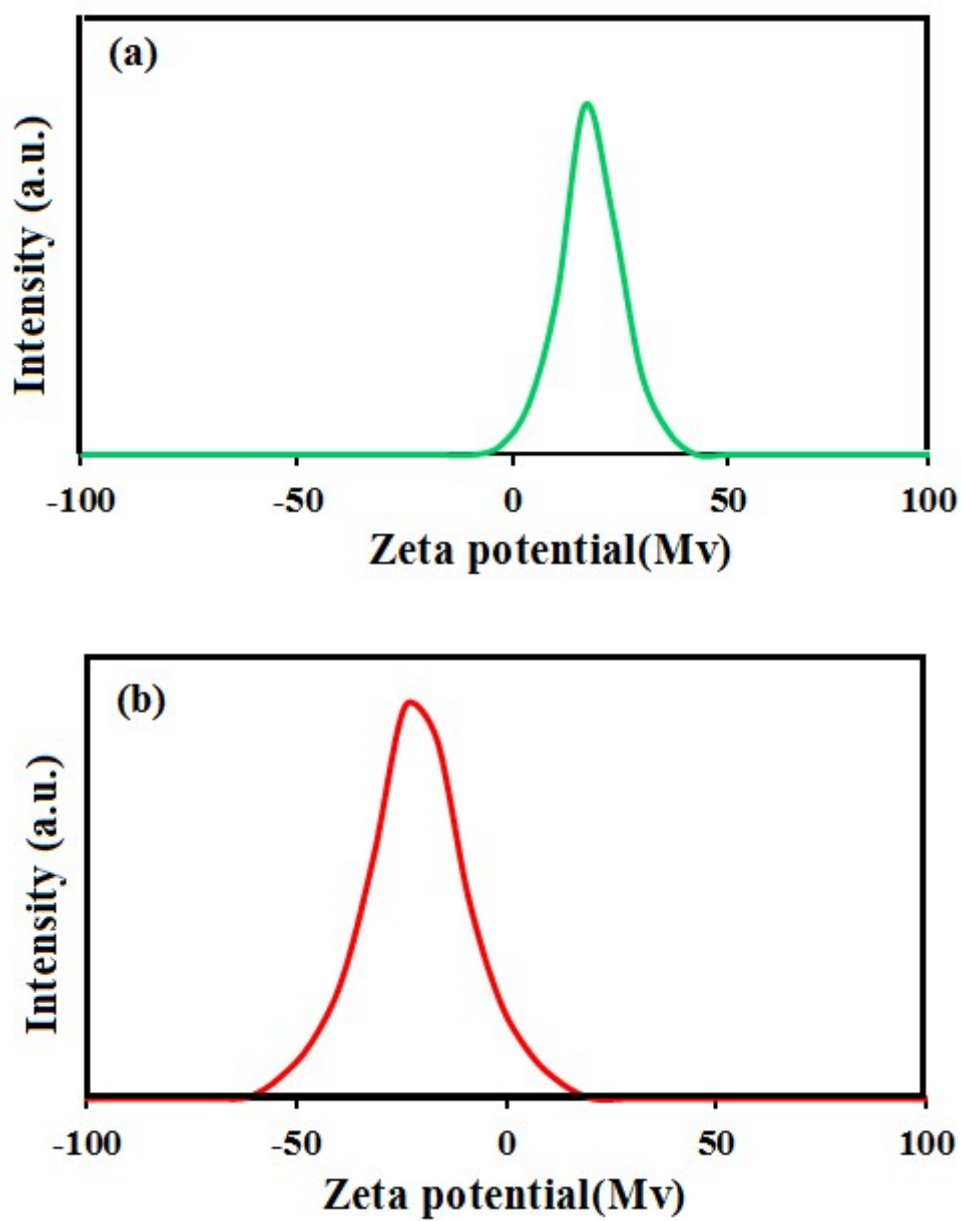

**Fig. S1.** Zeta potential curves of (a) pure MIL-101 and (b)  $P_2Mo_{18}/MIL-101$  (Cr) in aqueous solutions

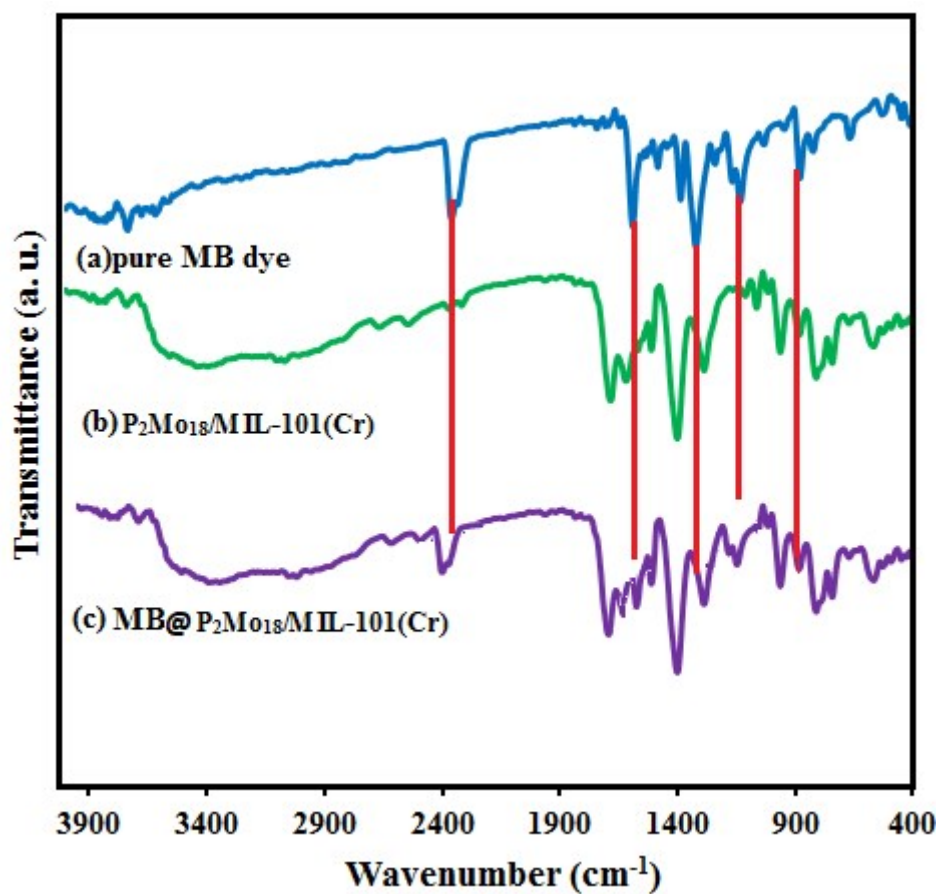

**Fig. S2.**(a) FT-IR spectrum of (a) pure MB dye, (b) P<sub>2</sub>Mo<sub>18</sub>/MIL-101 (Cr) and (c)MB@P<sub>2</sub>Mo<sub>18</sub>/MIL-101 (Cr) after adsorbing MB dye.

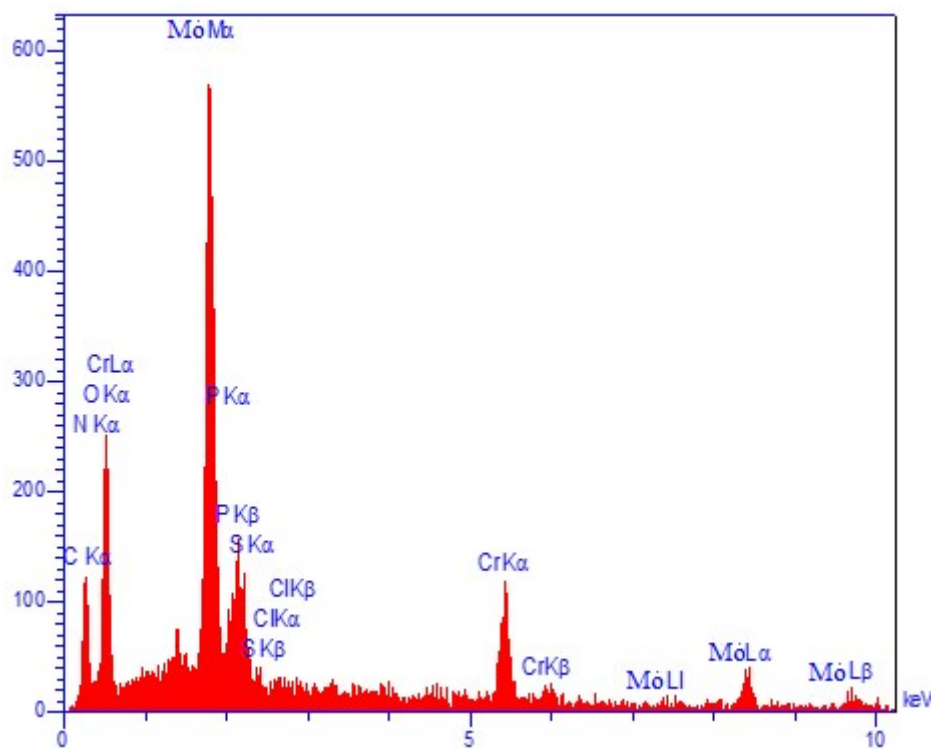

**Fig. S3.** EDX spectrum of the  $P_2Mo_{18}/MIL-101$  (Cr) after adsorbing MB dye.

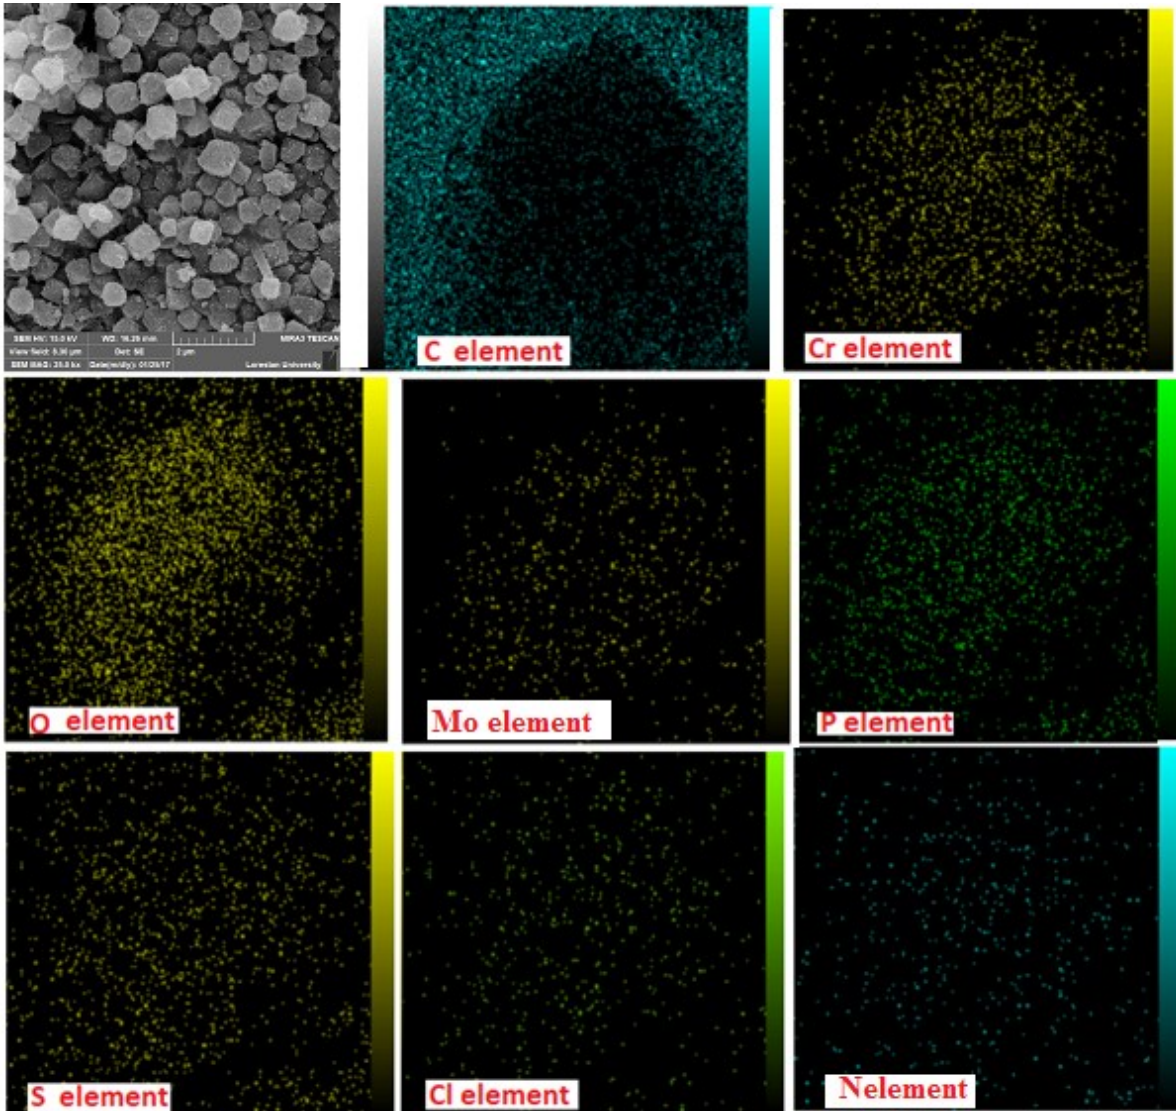

**Fig.S4.**EDX elemental mappings of the  $P_2Mo_{18}/MIL-101 (Cr)$  after adsorbing MB dye.

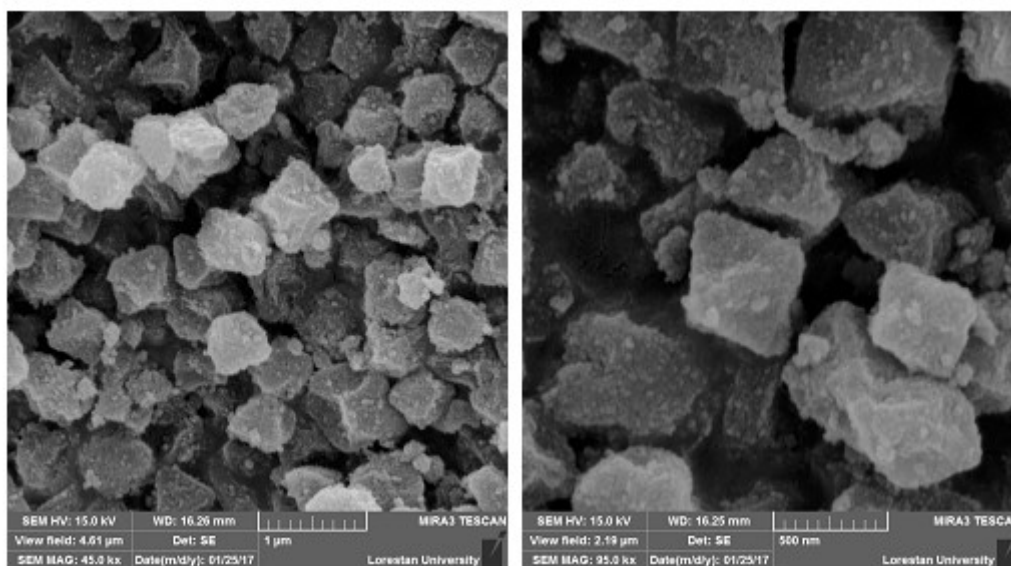

**Fig. S5.** FE-SEM images at different magnifications of the  $P_2Mo_{18}/MIL-101$  (Cr) after adsorbing MB dye.

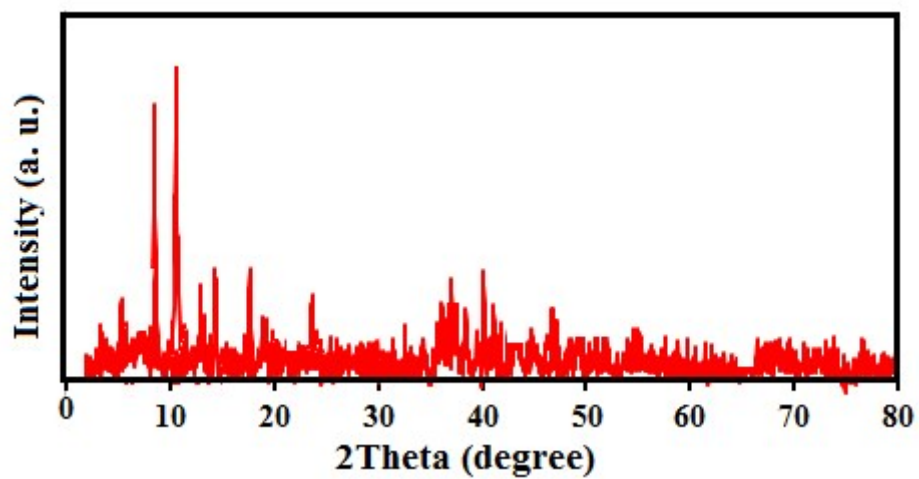

**Fig. S6.** XRD pattern of the  $P_2Mo_{18}/MIL-101$  (Cr) after adsorbing MB dye.

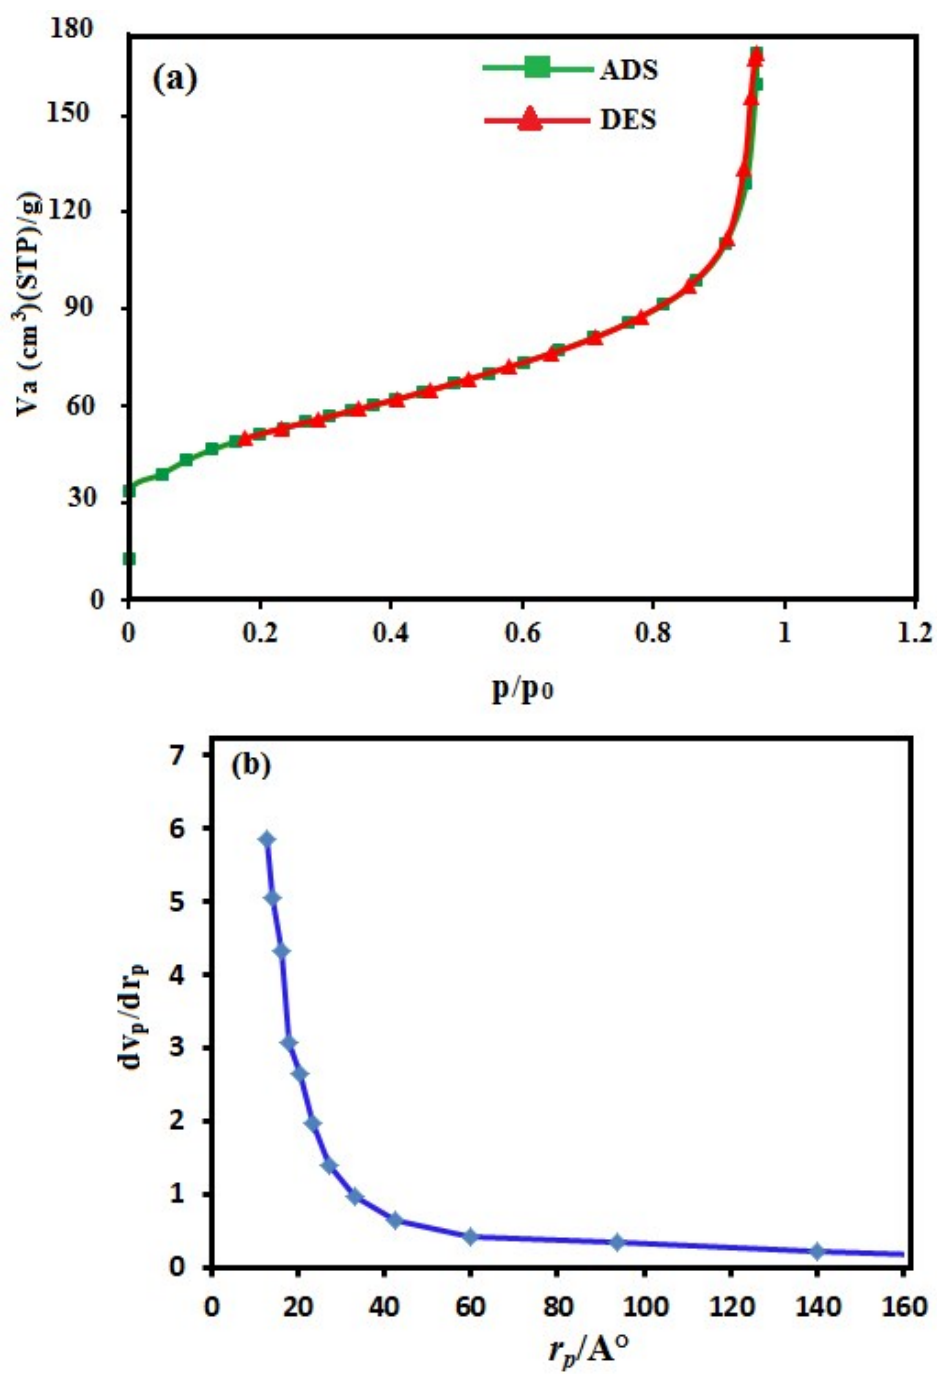

**Fig. S7.**(a)  $N_2$  adsorption-desorption isotherms and (b) BJH pore-size distribution plots of the  $P_2Mo_{18}/MIL-101$  (Cr) after adsorbing MB dye.
